# Supplementary material for: Computational approach to enhance thermoelectric performance of Ag2Se by S and Te substitutions
Source: Royal Society of Chemistry journal article supplement (doi:10.1039/d3cp05833f), 2024-01-01
Supplement: d3cp05833f1.pdf [file d3cp05833f1.pdf]

## Supporting Information

### Computational Approach to Enhance Thermoelectric Performance in $\text{Ag}_2\text{Se}$ by S and Te Substitutions

Raju K Biswas\*<sup>a</sup> and Swapan K Pati\*<sup>b</sup>

<sup>a</sup>*Department of Physics, Faculty of Physical and Mathematical Sciences (FMPS)  
M S Ramaiah University of Applied Sciences (MSRUAS), Bangalore 560058, India*

<sup>b</sup>*Theoretical Sciences Unit, School of Advanced Materials  
Jawaharlal Nehru Centre for Advanced Scientific Research (JNCASR)  
Jakkur P.O., Bangalore 560064, India.*

*E-mail: [raju.pi.mp@msruas.ac.in](mailto:raju.pi.mp@msruas.ac.in) & E-mail: [pati@jncasr.ac.in](mailto:pati@jncasr.ac.in)*

#### STABILITY STUDY:

To discuss the structural, thermodynamical, and chemical stability of the pseudobinary and pseudo ternary phases of  $\text{Ag}_2\text{Se}$ , we use ab-initio-based density functional perturbation theory (DFPT) methods. It has become a well-established technique for investigating the structural stability of various materials.[1,2] In this regard, our lattice dynamics study using phonon dispersion calculation reveals that pristine and doped  $\text{Ag}_2\text{Se}$  are dynamically stable. In phonon dispersion curves shown in **Fig. S2**, supplementary material, we observe that all vibrational modes are positive in magnitude, which implies the mechanical stability of both pristine and doped  $\text{Ag}_2\text{Se}$  crystal structures. Furthermore, thermodynamic stability is also examined by performing formation energy and binding energy calculations for doped  $\text{Ag}_2\text{Se}$ . The estimated formation energies for S-doped, Te-doped and Te & S co-doped  $\text{A}_2\text{Se}$  are -0.81 eV, -0.27 eV and -0.40 eV, respectively (Tabulated in **Table S1**, supplementary material). Moreover, binding energies are also calculated, which are -6.12 eV, -5.02 eV and -10.47 eV, respectively (Tabulated in **Table S1**, supplementary material). Interestingly, formation energy in combination with binding energy determines the chemical stability of these pseudobinary and pseudo ternary phases of  $\text{Ag}_2\text{Se}$ .

Formation energy:  $F.E = E(M@Ag_2Se) + E(Se) - E(Ag_2Se) - E(M)$  (S1)

Binding energy:  $B.E = E(Ag_2Se_{1-x}M_x) - E(Ag_2Se_{1-x}) - E(M)$  (S2)

Here, M= Te and S atoms.  $E(M@Ag_2Se)$ ,  $E(Se)$ ,  $E(Ag_2Se)$ ,  $E(M)$ , are the total energies of the unit cell where M atom substituted one Se atom, single Se atom in the unit cell,  $Ag_2Se$  unit cell, and single M atom in the unit cell, respectively. On the other hand,  $E(Ag_2Se_{1-x}M_x)$ ,  $E(Ag_2Se_{1-x})$ ,  $E(M)$ , are total energy of unit cell where one M atom substituted Se atom, one Se atom absent  $Ag_2Se$  unit cell, and single M atom unit cell, respectively.

**Table S1** Tabulated formation and binding energy per atom for pristine and doped  $Ag_2Se$ . Formation energy and binding energies for pristine  $Ag_2Se$  are considered as reference. The negative values of formation and binding energy imply that doped  $Ag_2Se$  crystal structures are stable.

| Energy (eV)            | $Ag_8Se_4$ | $Ag_8Se_3S$ | $Ag_8Se_3Te$ | $Ag_8Se_2TeS$ |
|------------------------|------------|-------------|--------------|---------------|
| Formation Energy (F.E) | 0.0        | -0.81       | -0.27        | -0.40         |
| Binding Energy (B.E)   | 0.0        | -0.51       | -0.41        | -0.87         |

**Table S2** List of k-points to plot electronic band structure for pristine and doped  $Ag_2Se$ :

|          |     |     |     |
|----------|-----|-----|-----|
| $\Gamma$ | 0.0 | 0.0 | 0.0 |
| M        | 0.5 | 0.0 | 0.0 |
| K        | 0.5 | 0.5 | 0.0 |

|          |     |     |     |
|----------|-----|-----|-----|
| $\Gamma$ | 0.0 | 0.0 | 0.0 |
| Z        | 0.0 | 0.0 | 0.5 |
| R        | 0.5 | 0.0 | 0.5 |
| X        | 0.5 | 0.5 | 0.5 |
| Z        | 0.0 | 0.0 | 0.5 |

**Table S3** Band gap estimated using HSE06 functional for pristine and doped Ag<sub>2</sub>Se.

| Materials  | Ag <sub>8</sub> Se <sub>4</sub> | Ag <sub>8</sub> Se <sub>3</sub> S | Ag <sub>8</sub> Se <sub>3</sub> Te | Ag <sub>8</sub> Se <sub>2</sub> TeS |
|------------|---------------------------------|-----------------------------------|------------------------------------|-------------------------------------|
| $E_g$ (eV) | 0.64                            | 0.78                              | 0.41                               | 0.66                                |

**Table S4**  $E^c$  and  $C_{3D}$  obtained for holes under acoustics phonon approximation.

| Materials                    | Ag <sub>8</sub> Se <sub>4</sub> | Ag <sub>8</sub> Se <sub>3</sub> S | Ag <sub>8</sub> Se <sub>3</sub> Te | Ag <sub>8</sub> Se <sub>2</sub> TeS |
|------------------------------|---------------------------------|-----------------------------------|------------------------------------|-------------------------------------|
| $E^c$ (eV)                   | 3.2                             | 1.68                              | 2.09                               | 1.32                                |
| $C_{3D}$ (J/m <sup>3</sup> ) | 4.2x10 <sup>11</sup>            | 2.74x10 <sup>11</sup>             | 3.57x10 <sup>11</sup>              | 1.47x10 <sup>11</sup>               |
| $m^*$                        | 0.78                            | 0.96                              | 0.81                               | 0.51                                |

**Table S5**  $E^c$  and  $C_{3D}$  obtained for electrons under acoustics phonon approximation.

| Materials                    | Ag <sub>8</sub> Se <sub>4</sub> | Ag <sub>8</sub> Se <sub>3</sub> S | Ag <sub>8</sub> Se <sub>3</sub> Te | Ag <sub>8</sub> Se <sub>2</sub> TeS |
|------------------------------|---------------------------------|-----------------------------------|------------------------------------|-------------------------------------|
| $E^c$ (eV)                   | 2.57                            | 2.24                              | 1.14                               | 2.4                                 |
| $C_{3D}$ (J/m <sup>3</sup> ) | 4.2x10 <sup>11</sup>            | 2.74x10 <sup>11</sup>             | 3.57x10 <sup>11</sup>              | 1.47x10 <sup>11</sup>               |

|       |      |      |      |      |
|-------|------|------|------|------|
| $m^*$ | 0.28 | 0.36 | 0.21 | 0.14 |
|-------|------|------|------|------|

**Table S6.**  $E^c$  and  $C_{3D}$  obtained for phonon under acoustics phonon approximation.

| Materials                               | $\text{Ag}_8\text{Se}_4$ | $\text{Ag}_8\text{Se}_3\text{S}$ | $\text{Ag}_8\text{Se}_3\text{Te}$ | $\text{Ag}_8\text{Se}_2\text{TeS}$ |
|-----------------------------------------|--------------------------|----------------------------------|-----------------------------------|------------------------------------|
| $E^c$ (eV)                              | 0.017                    | 0.002                            | 0.0029                            | 0.0033                             |
| $C_{3D}$ (J/m <sup>3</sup> )            | $119 \times 10^{11}$     | $2.74 \times 10^{11}$            | $3.57 \times 10^{11}$             | $1.47 \times 10^{11}$              |
| $\omega_{q_p^{LO}}$ (cm <sup>-1</sup> ) | 34.40                    | 34.73                            | 32.75                             | 29.35                              |

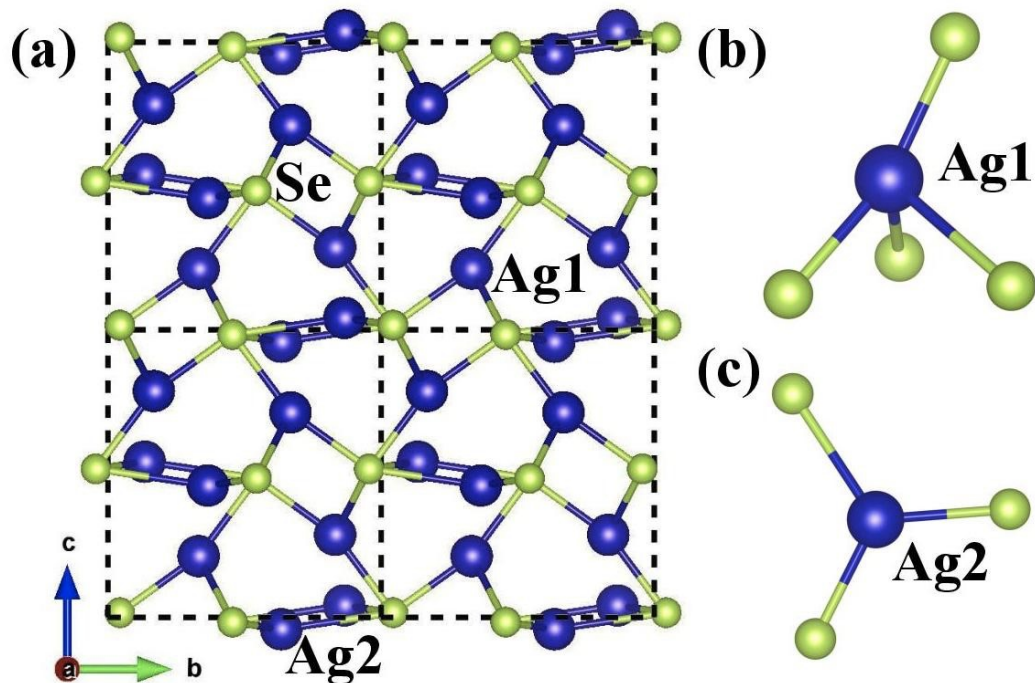

**Fig. S1** Crystal structure of  $\text{Ag}_2\text{Se}$  at room temperature. Silver atoms are shown as blue balls, selenium atoms as larger light green balls. (a)  $\text{Ag}_2\text{Se}$  crystal structure viewed from  $a$ -axis. Local atomic coordination of Ag atoms in the crystal structure

where (b) Ag1 atoms are arranged tetrahedrally. (c) The coordination sphere of Ag2 is triangular.

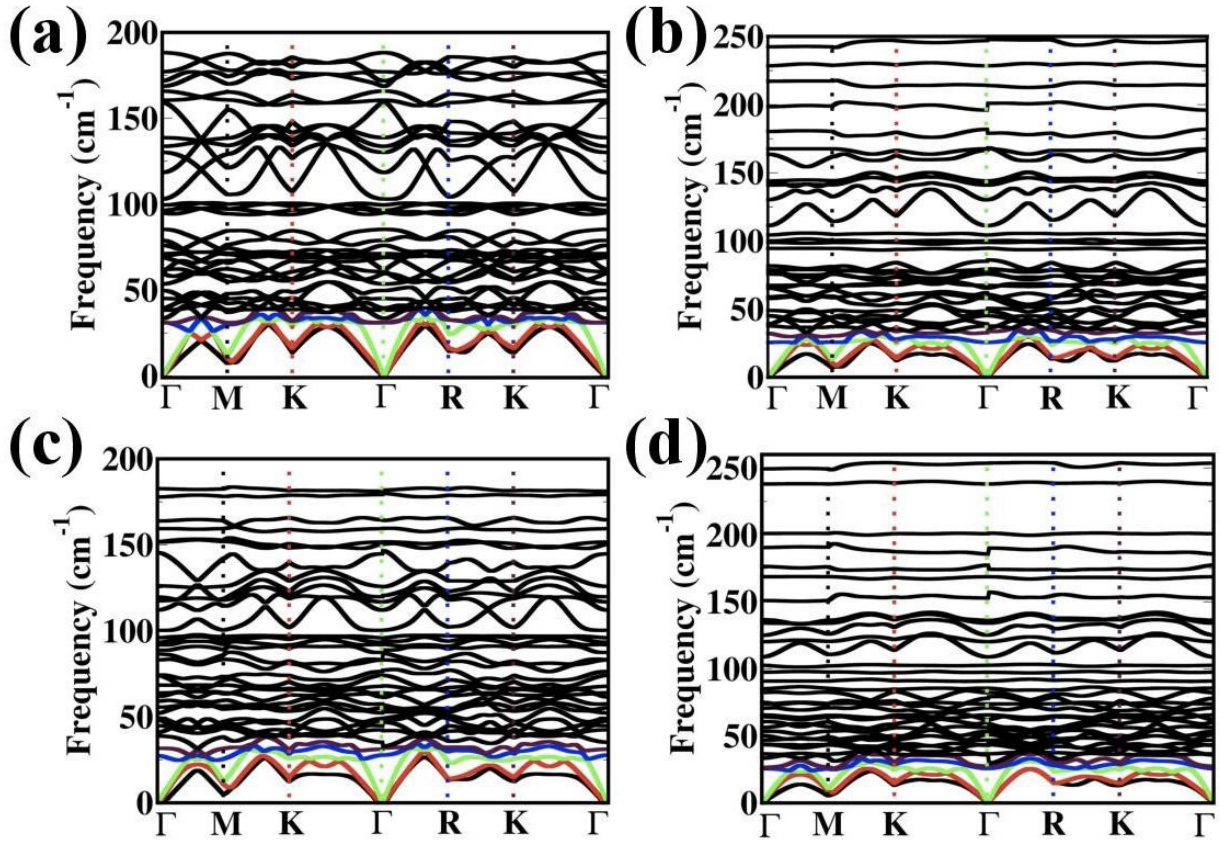

**Fig. S2** Phonon dispersion curve of (a)  $\text{Ag}_8\text{Se}_4$ , (b)  $\text{Ag}_8\text{Se}_3\text{S}$ , (c)  $\text{Ag}_8\text{Se}_3\text{Te}$ , (d)  $\text{Ag}_8\text{Se}_2\text{TeS}$ , have been calculated using DFPT and plotted as a function of q-point. The lattice dynamics curves signify both pristine and doped  $\text{Ag}_2\text{Se}$  are dynamically stable. The green and red colour phonon bands represent longitudinal and transverse acoustics modes, respectively. On the other hand, the blue colour phonon band signifies low energetic optical phonon mode.

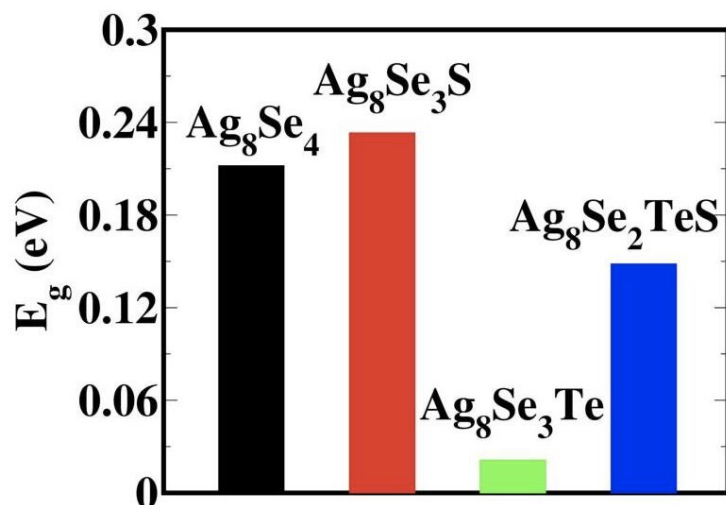

Fig. S3 PBE-SOC bandgap for pristine and doped Ag<sub>2</sub>Se.

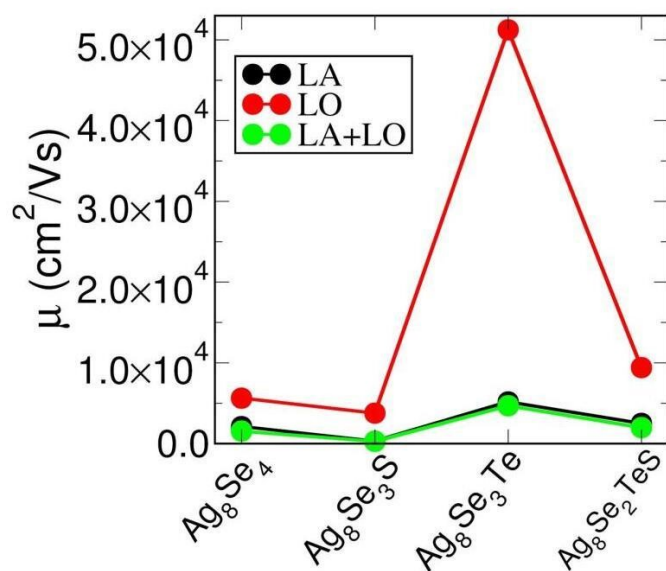

Fig. S4 Mode resolved mobility for pristine as well as doped Ag<sub>2</sub>Se. Black line represents mobility limited by the longitudinal acoustics (LA) phonon; Red line represents mobility limited by the longitudinal optical (LO) phonon; Green line represents mobility limited by both LA as well as LO phonons.

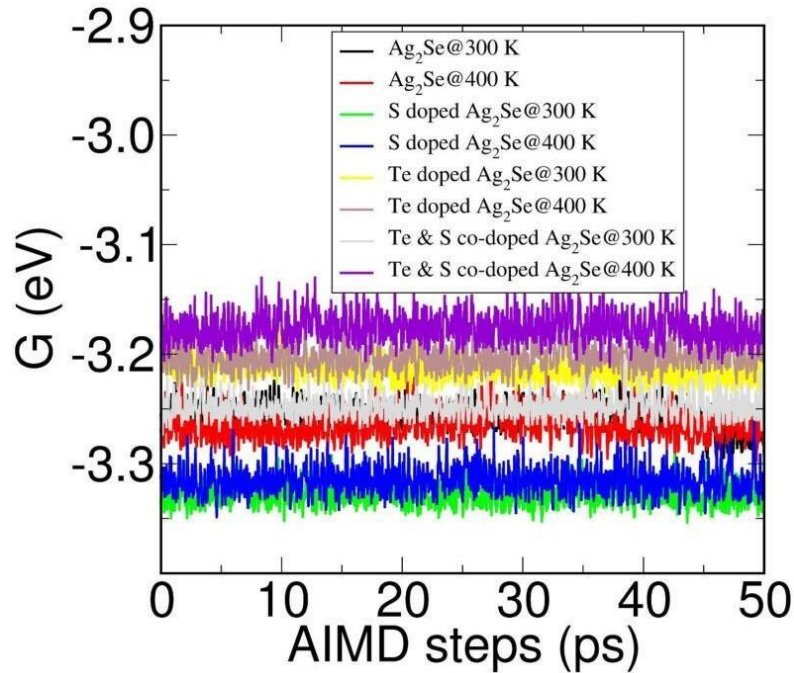

**Fig. S5** Gibbs free energy as a function of AIMD steps is plotted for pristine and doped  $\text{Ag}_2\text{Se}$  at 300 K and 400 K.

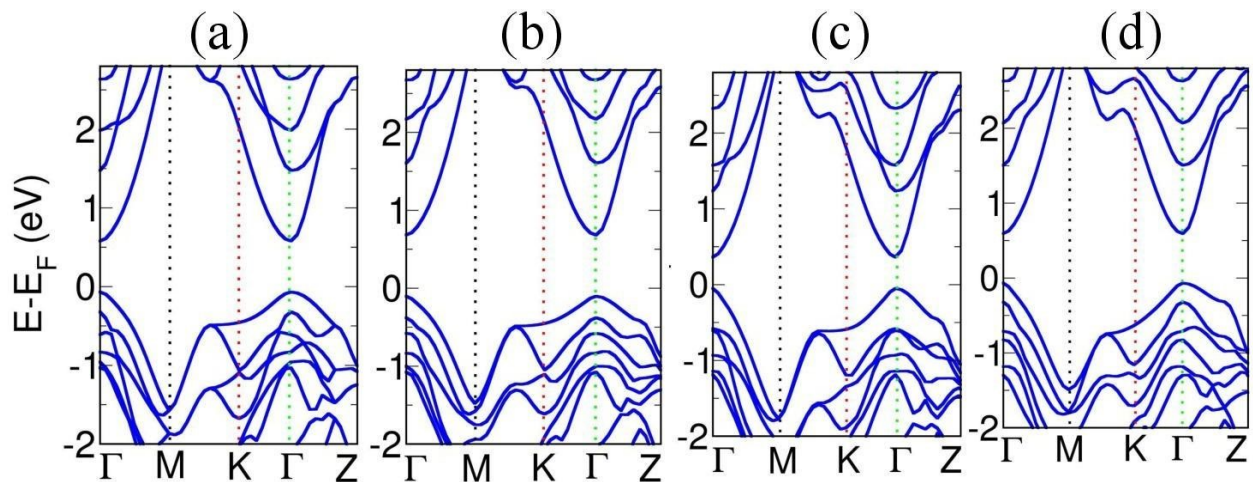

**Fig. S6** Electronic band structure at the HSE06 of (a) Pristine, (b) S doped, (c) Te doped, (d) Te & S co-doped,  $\text{Ag}_2\text{Se}$ , along the high symmetry k-points. The Fermi level is considered as a reference for each figure.

**ESTIMATION OF CARRIER DENSITY:** Intrinsic carrier density ( $n$ ) of semiconductor with parabolic energy band dispersion can be calculated using the expression [3],

$$n = 2 \left( \frac{2\pi k_B T}{h^2} \right)^{\frac{3}{2}} (m_e^* m_h^*)^{\frac{3}{4}} \exp\left(-\frac{E_g}{2k_B T}\right) \quad (\text{S3})$$

where  $k_B$ ,  $h$ ,  $T$  are Boltzmann constant, Planck constant and room temperature in Kelvin (300 K), respectively.  $E_g$ ,  $m_e^*$ , and  $m_h^*$  are electronic band gap, electron and hole effective masses, respectively.

## REFERENCES

- (1) D. Y. Kim, J. S. de Almeida, L. Koči, R. Ahuja, Applied physics letters 2007, 90, 171903.
- (2) S. A. Khandy, I. Islam, D. C. Gupta, R. Khenata, A. Laref, Scientific reports 2019, 9, 1-8.
- (3) A. Rogalski, K. Jóźwikowski, Infrared physics, 1989, 29, 35-42.
